# Supplementary material
Source: Springer Nature journal article supplement (https://www.springerprofessional.de/resource/supplementary/13638_2011_514_MOESM3_ESM.pdf/11897982)

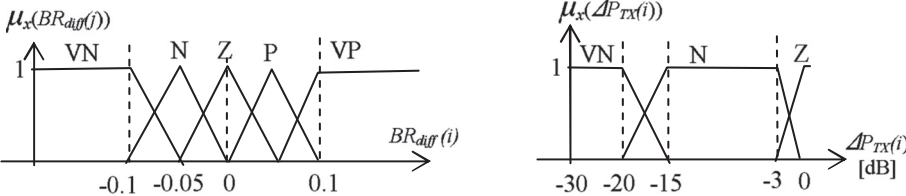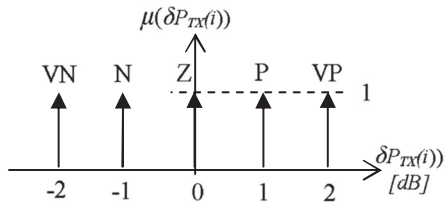

(a)

| $BR_{diff}(i)$ | $Margin_{P_{TX}(i)}$ | $\delta P_{TX}(i)$ |
|----------------|----------------------|--------------------|
| VP             | -                    | VN                 |
| P              | -                    | N                  |
| N              | N                    | P                  |
| N              | VN                   | P                  |
| Z              | VN                   | P                  |
| Z              | N                    | P                  |
| VN             | N                    | P                  |
| VN             | VN                   | VP                 |
| Z              |                      | Z                  |

(b)

Supplement: MOESM3 [file 11897982]
